# Supplementary material for: TiO2 enhanced ultraviolet detection based on a graphene/Si Schottky diode
Source: Royal Society of Chemistry journal article supplement (doi:10.1039/c5ta00702j), 2015-01-01
Supplement: c5ta00702j1.pdf [file c5ta00702j1.pdf]

### Electronic Supplementary Information

#### TiO<sub>2</sub> Enhanced Ultraviolet Detection Based on Graphene/Si Schottky Diode

Miao Zhu,<sup>ab</sup> Li Zhang,<sup>a</sup> Xinming Li,<sup>c</sup> Yijia He,<sup>ab</sup> Xiao Li,<sup>a</sup> Fengmei Guo,<sup>a</sup> Xiaobei Zang,<sup>a</sup> Kunlin Wang,<sup>a</sup> Dan Xie,<sup>d</sup> Xuanhua Li,<sup>e</sup> Bingqing Wei,<sup>ef</sup> and Hongwei Zhu<sup>ab</sup>

<sup>a</sup>School of Materials Science and Engineering, State Key Laboratory of New Ceramics and Fine Processing, Tsinghua University, Beijing 100084, China

<sup>b</sup>Center for Nano and Micro Mechanics, Tsinghua University, Beijing 100084, China

<sup>c</sup>National Center for Nanoscience and Technology, Zhongguancun, Beijing 100190, China

<sup>d</sup>Tsinghua National Laboratory for Information Science and Technology (TNList), Institute of Microelectronics, Tsinghua University, Beijing 100084, China

<sup>e</sup>School of Materials Science and Engineering, Northwestern Polytechnical University, Xi'an 710072, China

<sup>f</sup>Department of Mechanical Engineering, University of Delaware, Newark, DE 19716, USA

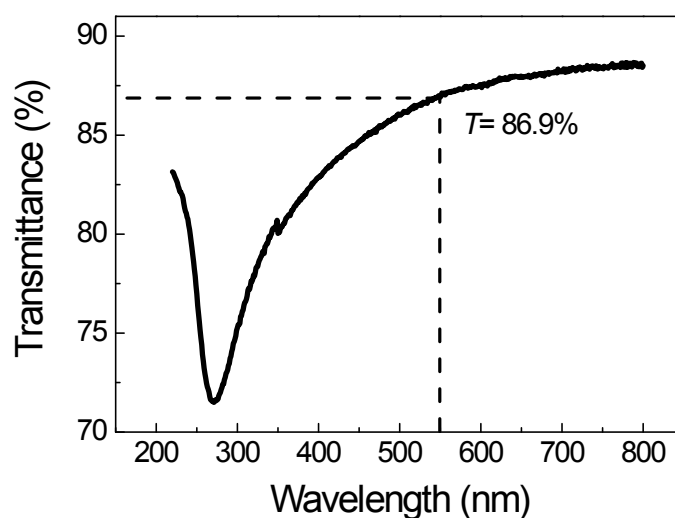

**Figure S1.** Transmittance of graphene. The transmittance is about 86.9% at 550 nm, corresponding to a thickness of ~2 nm (the number of layers is ~6).

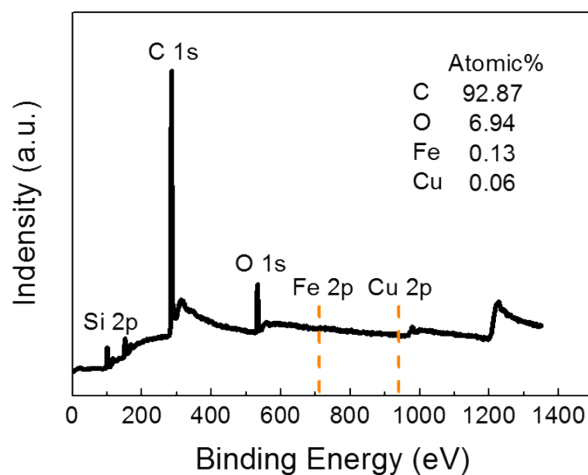

**Figure S2.** XPS of as-prepared graphene (on Si substrate). The contents of metallic impurities (*e.g.*, Fe, Cu) in graphene are quite low.

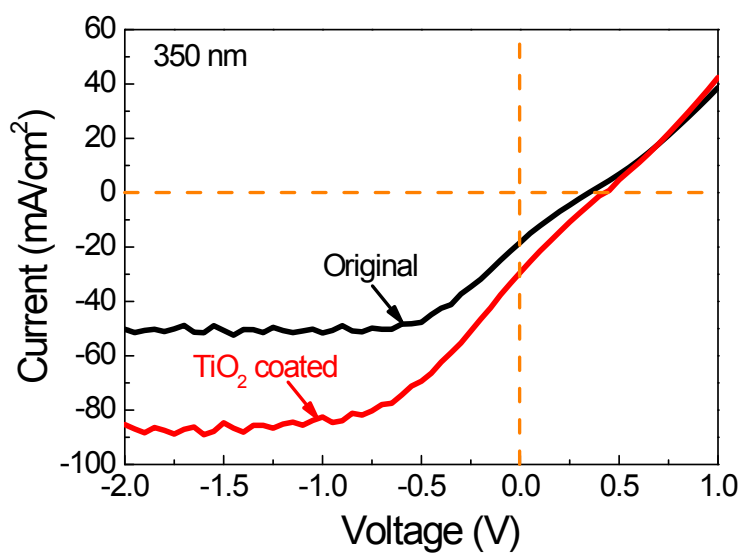

**Figure S3.**  $I$ - $V$  characteristics of the device before and after  $\text{TiO}_2$  coating, tested at 350 nm incident light.

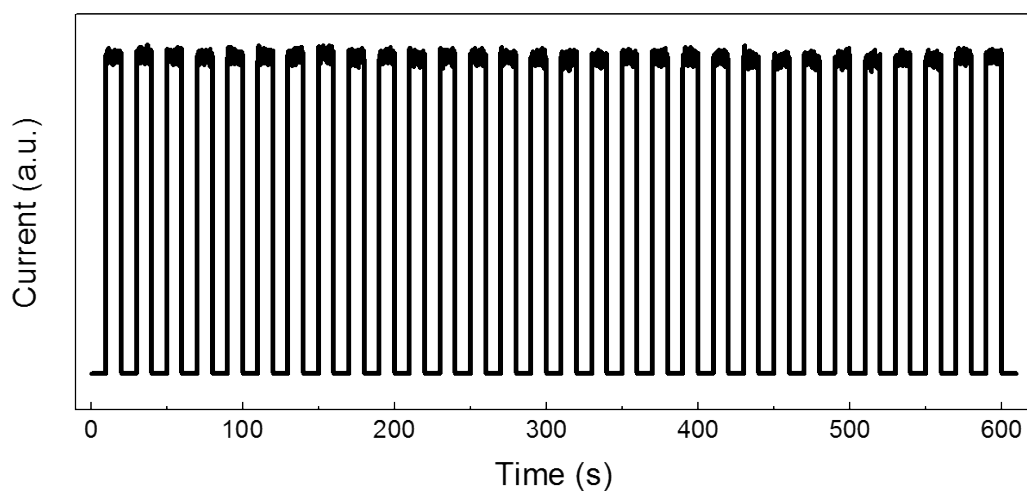

**Figure S4.** Response repeatability of the switching behavior of TiO<sub>2</sub>/graphene/Si device in 10 min.

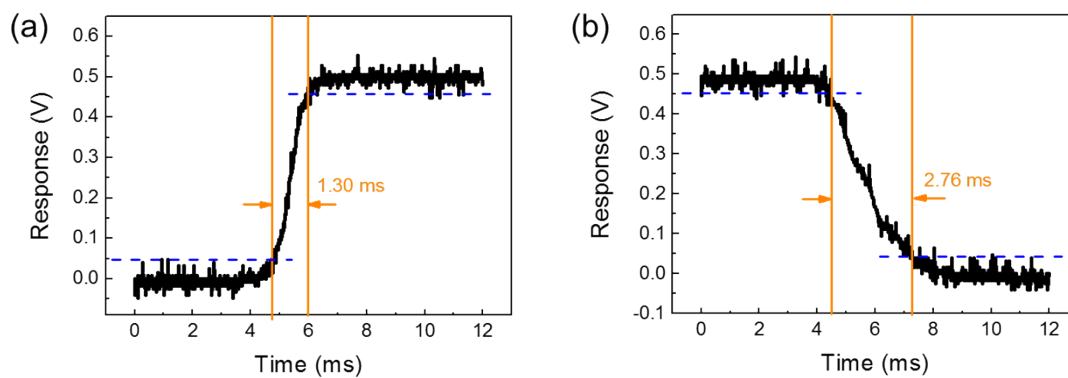

**Figure S5.** (a) Response and (b) recovery of the TiO<sub>2</sub>/graphene/Si device. The response and recovery times are confirmed as the time interval from 10% to 90% (90% to 10%) of its peak value.<sup>1,2</sup>

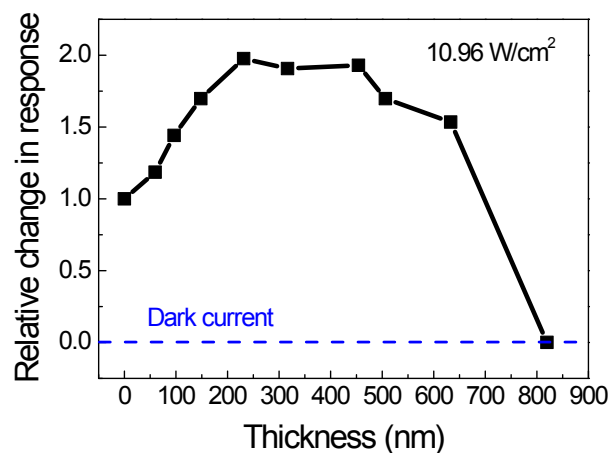

**Figure S6.** Relative change of the response current versus the thickness of TiO<sub>2</sub> layer.

The thickness of the TiO<sub>2</sub> layer was tuned by repeatedly spin-coating the TiO<sub>2</sub> NPs on a same device. An ultraviolet source with stronger intensity was used to guarantee enough photons penetrate the TiO<sub>2</sub> layer and therefore enable investigation for a wider range of thicknesses of the TiO<sub>2</sub> layers. The response current increased along with the thickness of TiO<sub>2</sub> at beginning, after a stable region, the response decayed and then sharply decreased to the level of dark current. One possible reason was that thick TiO<sub>2</sub> layer within certain range may provide more excitons beneficial to reduce the tunneling recombination of the charge layers. Thicker TiO<sub>2</sub> layer might lead to severe energy loss of the incident ultraviolet, therefore resulted in negative effects.

#### References:

- [1] D. Wu, Y. Jiang, Y. Zhang, J. Li, Y. Yu, Y. Zhang, Z. Zhu, L. Wang, C. Wu, L. Luo and J. Jie, *J. Mater. Chem.*, 2012, **22**, 6206.
- [2] P. Wu, Y. Dai, T. Sun, Y. Ye, H. Meng, X. Fang, B. Yu and L. Dai, *ACS Appl. Mater. Interfaces*, 2011, **3**, 1859.
